# Supplementary material for: The Relationship between Neuroticism, Hopelessness, and Depression in Older Korean Immigrants
Source: PLoS One. 2016 Jan 4;11(1):e0145520. doi: 10.1371/journal.pone.0145520 (PMC4699713; doi:10.1371/journal.pone.0145520)
Supplement: S1 Data — (XLSX) [file pone.0145520.s001.xlsx]

## Sheet: Data
id	m17	m18	m20	m21	m22	m23	m24	m25	m27_1	m27_2	m27_3	m27_4	m27_5	m27	a1	a2	a3	a3_adl	a3_iadl	a3_1	a3_2	a3_3	a3_4	a3_5	a3_6	a3_7	a3_8	a3_9	a3_10	b4	c5	c6fs	c6nfs	c6sat	c6_1_1	c6_1_2	c6_1_3	c6_1_4	c6_1_5	c6_2	c6_3_1	c6_3_2	c6_3_3	c6_3_4	c6_3_5	c6_4	c6_5_2	c6_5_3	c6_5_4
1	2	80	3	15	1	850	1	1	1	1	1	1	1	5	3	2	8	4	4	1	1	1	1	0	1	2	0	1	0	0	1	0.25	0	0.63	1	0	0	0	0	0	1	0	0	0	0	0	0	0	0
2	2	82	3	6	1	840	1	1	1	1	1	1	1	5	5	1	10	5	5	1	1	1	2	0	2	2	0	1	0	0	0	0.38	0	2	1	0	0	0	0	0	1	0	0	0	0	0	0	0	0
3	2	79	5	20	1	800	1	1	1	1	1	1	3	7	3	2	6	3	3	1	0	1	0	1	0	0	0	2	1	1	0	3.25	3.63	5.88	0	1	6	1	2	6	0	1	4	1	5	6	1	3	1
4	2	80	3	13	1	0	1	3	1	1	1	1	1	5	4	3	15	5	10	2	1	1	1	0	2	2	2	2	2	1	0	0.38	0	1.5	1	0	0	0	0	0	1	0	0	0	0	0	1	1	0
5	2	92	3	5	1	840	1	4	1	1	1	1	1	5	5	1	15	6	9	2	1	2	1	0	2	2	1	2	2	2	1	0.88	0	5.25	0	1	1	0	0	6	0	1	1	0	0	6	1	1	0
6	2	77	3	6	1	820	1	1	1	1	1	1	1	5	6	2	9	5	4	1	0	1	2	1	2	2	0	0	0	2	0	2.25	0	5.88	0	1	2	0	0	6	0	1	2	0	0	6	1	3	0
7	1	85	2	11	1	0	1	4	2	2	2	1	3	10	4	4	14	6	8	1	2	2	1	0	2	2	0	2	2	1	1	4.38	0	6	0	1	5	0	0	6	0	1	5	0	0	6	1	5	0
8	2	78	3	11	1	840	1	1	1	1	1	1	1	5	5	2	8	4	4	1	1	1	1	0	1	1	0	1	1	0	1	1	2.25	6	0	1	1	1	3	6	0	1	1	1	3	6	1	1	1
9	1	89	2	20	1	1100	1	2	3	3	2	1	3	12	2	2	8	3	5	1	1	0	1	0	2	2	0	1	0	1	0	1.25	0	6	0	1	2	0	0	6	0	1	1	0	0	6	1	1	0
10	2	78	2	0	1	600	1	1	1	1	1	1	1	5	3	3	7	3	4	1	0	1	1	0	1	1	0	1	1	1	0	0	0.63	2.63	0	0	0	1	1	5	0	0	0	1	1	3	0	0	0
[truncated: 304 more columns]
